# Supplementary material
Source: publisher site journal article supplement (https://www.dovepress.com/get_supplementary_file.php?f=452062.docx)

Supplementary Table 1

The chromosome 1q21 status of all patients.

| Sample ID manuscript | Sample ID HIPO K43R | Treatment  time-point | 1q21 status |
| --- | --- | --- | --- |
| RRMM16 | K43R-VP6CSY-T1 | pre | 1q21 diploid |
| K43R-VP6CSY-N1 | pre | 1q21 diploid |
| K43R-VP6CSY-T2 | post | 1q21 diploid |
| K43R-VP6CSY-N2 | post | 1q21 diploid |
| RRMM01 | K43R-2FTMUU-T1 | pre | 1q21 diploid |
| K43R-2FTMUU-N1 | pre | 1q21 diploid |
| K43R-2FTMUU-T2 | post | 1q21 diploid |
| K43R-2FTMUU-N2 | post | 1q21 diploid |
| RRMM10 | K43R-N7ZK3L-T1 | pre | 1q21 diploid |
| K43R-N7ZK3L-N1 | pre | 1q21 diploid |
| K43R-N7ZK3L-T2 | post | 1q21 diploid |
| K43R-N7ZK3L-N2 | post | 1q21 diploid |
| RRMM18 | K43R-YK554L-T1 | pre | 1q21 gain |
| K43R-YK554L-N1 | pre | 1q21 gain |
| K43R-YK554L-T2 | post | 1q21 gain |
| K43R-YK554L-N2 | post | 1q21 gain |
| K43R-YK554L-F2 | post | 1q21 gain |
| RRMM12 | K43R-PUVQFD-T1-H01 | pre | 1q21 gain |
| K43R-PUVQFD-N1-H01 | pre | 1q21 gain |
| K43R-PUVQFD-F1-H01 | pre | 1q21 gain |
| K43R-PUVQFD-T1-H02 | pre | 1q21 gain |
| K43R-PUVQFD-N1-H02 | pre | 1q21 gain |
| K43R-PUVQFD-F1-H02 | pre | 1q21 gain |
| RRMM15 | K43R-TS6ZX9-T1 | pre | 1q21 gain |
| K43R-TS6ZX9-N1 | pre | 1q21 gain |
| K43R-TS6ZX9-T2 | post | 1q21 gain |
| K43R-TS6ZX9-N2 | post | 1q21 gain |
| RRMM20 | K43R-ZVNGET-T2 | pre | 1q21 gain |
| K43R-ZVNGET-T3 | pre | 1q21 gain |
| RRMM08 | K43R-E79WZA-T1-H01 | pre | 1q21 gain |
| K43R-E79WZA-N1-H01 | pre | 1q21 gain |
| K43R-E79WZA-F1-H01 | pre | 1q21 gain |
| K43R-E79WZA-T1-H02 | pre | 1q21 gain |
| K43R-E79WZA-N1-H02 | pre | 1q21 gain |
| K43R-E79WZA-F1-H02 | pre | 1q21 gain |
| RRMM06 | K43R-8YGUU8-T2 | pre | 1q21 gain |
| K43R-8YGUU8-Z2 | pre | 1q21 gain |
| K43R-8YGUU8-T3 | post | 1q21 gain |
| K43R-8YGUU8-Z3 | post | 1q21 gain |
| K43R-8YGUU8-T4 | post_2 | 1q21 gain |
| K43R-8YGUU8-Z4 | post_2 | 1q21 gain |
| K43R-8YGUU8-F4 | post_2 | 1q21 gain |
| RRMM02 | K43R-32ARQL-T2 | post | 1q21 gain |
| K43R-32ARQL-N2 | post | 1q21 gain |
| RRMM03 | K43R-37A66E-T1 | pre | 1q21 gain |
| K43R-37A66E-N1 | pre | 1q21 gain |
| RRMM09 | K43R-N5CC3E-T1 | pre | 1q21 gain |
| K43R-N5CC3E-Z1 | pre | 1q21 gain |
| K43R-N5CC3E-T2 | post | 1q21 gain |
| K43R-N5CC3E-Z2 | post | 1q21 gain |
| RRMM05 | K43R-6KLSUS-T2-H01 | pre | 1q21 negative |
| K43R-6KLSUS-N2-H01 | pre | 1q21 negative |
| K43R-6KLSUS-F2-H01 | pre | 1q21 negative |
| K43R-6KLSUS-T2-H02 | pre | 1q21 negative |
| K43R-6KLSUS-N2-H02 | pre | 1q21 negative |
| K43R-6KLSUS-F2-H02 | pre | 1q21 negative |
| RRMM13 | K43R-R1H4HE-T1 | pre | 1q21 negative |
| K43R-R1H4HE-N1 | pre | 1q21 negative |
| RRMM17 | K43R-XF2DTB-T2 | post | 1q21 negative |
| K43R-XF2DTB-N2 | post | 1q21 negative |
| RRMM07 | K43R-CSU6UB-T2 | pre | 1q21 negative |
| K43R-CSU6UB-Z2 | pre | 1q21 negative |
| K43R-CSU6UB-T3 | post | 1q21 negative |
| K43R-CSU6UB-Z3 | post | 1q21 negative |
| RRMM04 | K43R-6K8YTY-T2 | pre | 1q21 negative |
| K43R-6K8YTY-Z2 | pre | 1q21 negative |
| K43R-6K8YTY-T3 | post | 1q21 negative |
| K43R-6K8YTY-Z3 | post | 1q21 negative |
| K43R-6K8YTY-F3 | post | 1q21 negative |
| RRMM019 | K43R-ZPMZFJ-T1 | pre | 1q21 negative |
| K43R-ZPMZFJ-N1 | pre | 1q21 negative |
| K43R-ZPMZFJ-T2 | post | 1q21 negative |
| K43R-ZPMZFJ-N2 | post | 1q21 negative |

Supplementary Table 2

The ratio of S100A9 plasma cells in 1q21 gain and 1q21 diploid MM tissues compared to 1q21 negative MM patients.

|  | TNFRSF17 Plasma | non-TNFRSF17 Plasma | Sum |
| --- | --- | --- | --- |
| 1q21_diploid | 3406 | 3329 | 6735 |
| 1q21_gain | 15857 | 34249 | 50106 |
| non_1q21 | 8036 | 9149 | 17185 |
|  |  |  | p=0.0E0 Chi-squared test |
|  |  |  |  |
|  | S100A9 Plasma | non-S100A9 Plasma | Sum |
| 1q21_diploid | 1677 | 5058 | 6735 |
| 1q21_gain | 19923 | 30183 | 50106 |
| non_1q21 | 1777 | 15408 | 17185 |
|  |  |  | p=0.0E0 Chi-squared test |
|  |  |  |  |
|  | AHNAK Plasma | non-AHNAK Plasma | Sum |
| 1q21_diploid | 761 | 5974 | 6735 |
| 1q21_gain | 6056 | 44050 | 50106 |
| non_1q21 | 1706 | 15479 | 17185 |
|  |  |  | p=1.6325E-13 Chi-squared test |
|  |  |  |  |
|  | STMN1 Plasma | non-STMN1 Plasma | Sum |
| 1q21_diploid | 461 | 6274 | 6735 |
| 1q21_gain | 3621 | 46485 | 50106 |
| non_1q21 | 1738 | 15447 | 17185 |
|  |  |  | p=5.4392E-35 Chi-squared test |
|  |  |  |  |
|  | ODC1 Plasma | non-ODC1 Plasma | Sum |
| 1q21_diploid | 385 | 6350 | 6735 |
| 1q21_gain | 695 | 49411 | 50106 |
| non_1q21 | 2610 | 14575 | 17185 |
|  |  |  | p=0.0E0 Chi-squared test |
|  |  |  |  |
|  | CCND1 Plasma | non-CCND1 Plasma | Sum |
| 1q21_diploid | 7 | 6728 | 6735 |
| 1q21_gain | 2434 | 47672 | 50106 |
| non_1q21 | 4 | 17181 | 17185 |
|  |  |  | p=1.35E-227 Chi-squared test |
|  |  |  |  |
|  | FABP5 Plasma | non-FABP5 Plasma | Sum |
| 1q21_diploid | 26 | 6709 | 6735 |
| 1q21_gain | 239 | 49867 | 50106 |
| non_1q21 | 1311 | 15874 | 17185 |
|  |  |  | p=0.0E0 Chi-squared test |
|  |  |  |  |
|  | ITGA8 Plasma | non-ITGA8 Plasma | Sum |
| 1q21_diploid | 12 | 6723 | 6735 |
| 1q21_gain | 1281 | 48825 | 50106 |
| non_1q21 | 3 | 17182 | 17185 |
|  |  |  | p=5.2572E-128 Chi-squared test |

Supplementary figure1. The identification of immune-related genes associated with S100A9 plasma cells. (**A**) The tSNE chart of three clusters. (**B-C**) The network topology analysis was conducted using multiple soft thresholds. (**D**) The cluster tree diagram illustrates the grouping of genes based on their topological overlap and assigns module colors.


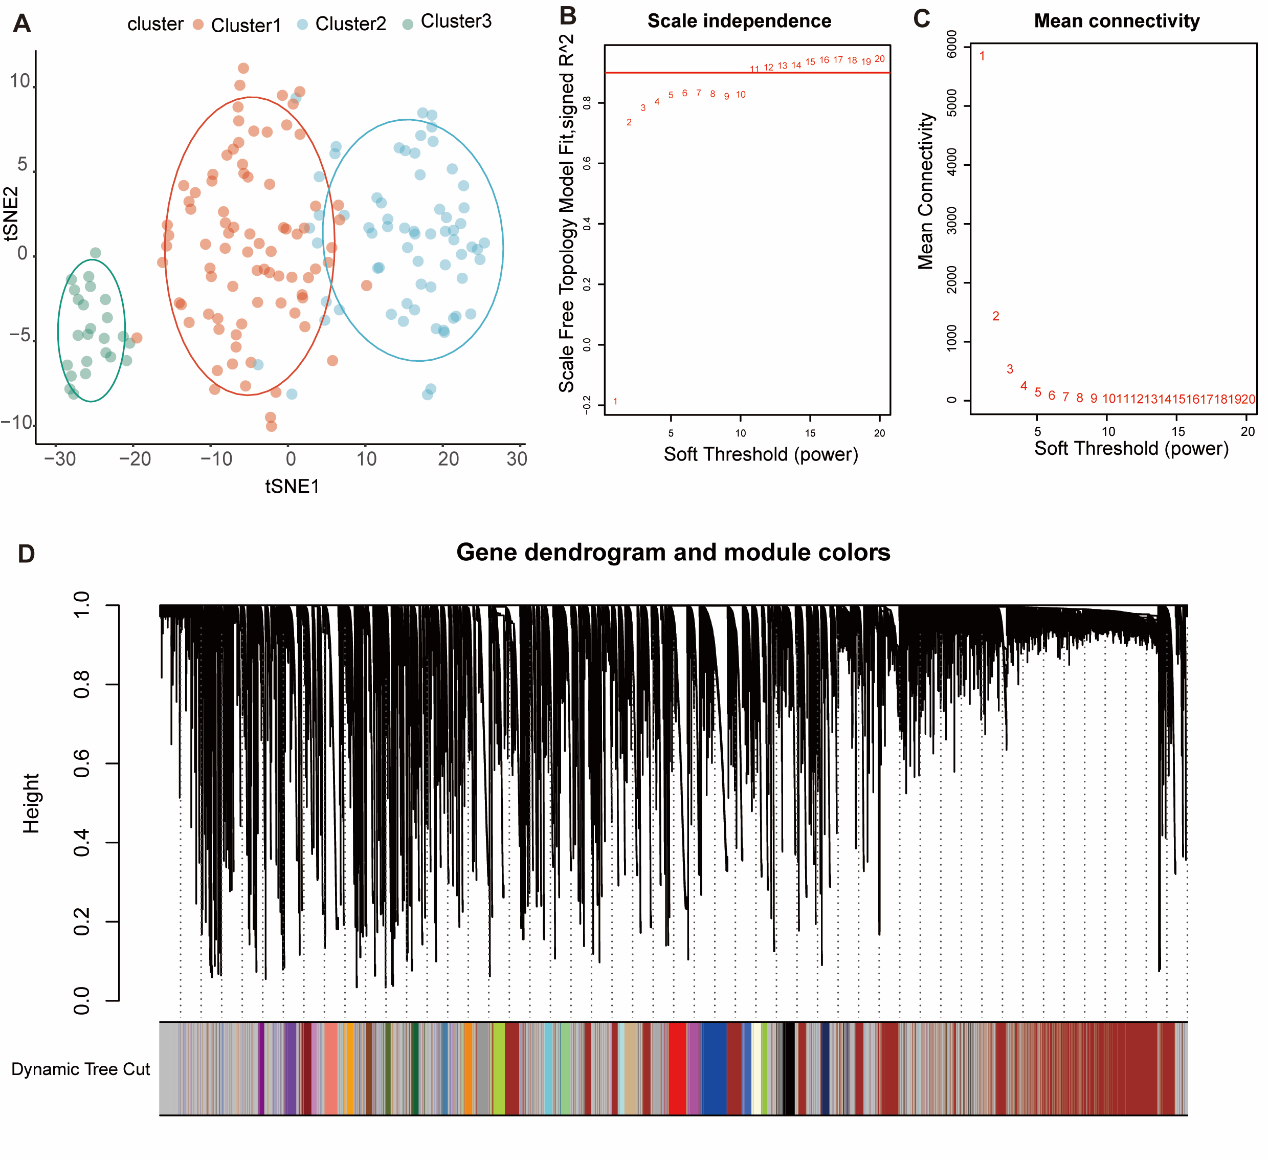

Supplement: Supplementary file 1 [file get_supplementary_file.php]
